# Supplementary material for: Photoluminescence Mechanism of Carbon Dots: Triggering Multiple Color Emissions through Controlling the Degree of Protonation
Source: MDPI journal article supplement (doi:10.3390/molecules27196517), 2022-10-02
Supplement: s1 [file s1]

# Supporting Information

## Photoluminescence Mechanism of Carbon Dots: Triggering Multiple Color Emissions through Controlling the Degree of Protonation

Hao Yi<sup>1</sup>, Jing Liu<sup>1</sup>, Jian Yao<sup>1</sup>, Ruixing Wang<sup>1</sup>, Wenying Shi<sup>1\*</sup>, Chao Lu<sup>1</sup>

<sup>1</sup> State Key Laboratory of Chemical Resource Engineering, Beijing University of Chemical Technology, 15 Beisanhuan East Road, P.O. Box 98, 100029, Beijing (P. R. China).

\* Correspondence: shiwy@mail.buct.edu.cn

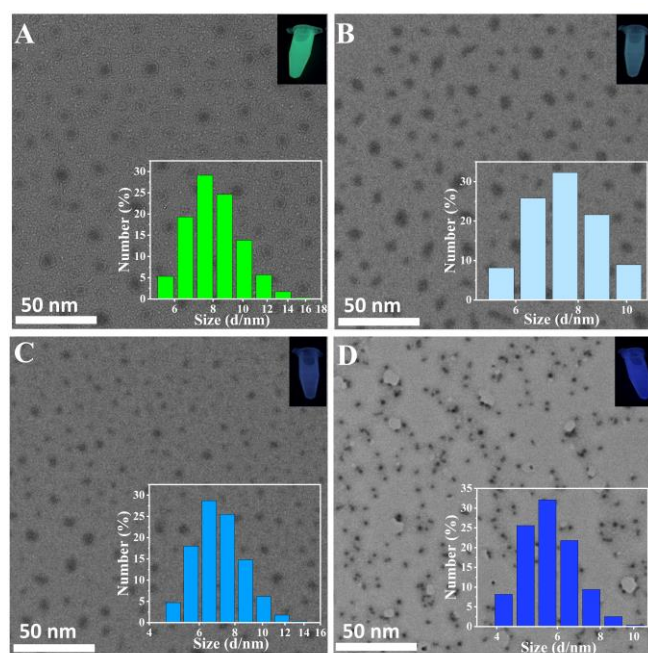

**Figure S1.** TEM images of (A) the 2-CDs, (B) 7-CDs, (C) 10-CDs and (D) 14-CDs. Inset: the photos of four CDs under ultraviolet and their particle size distribution.

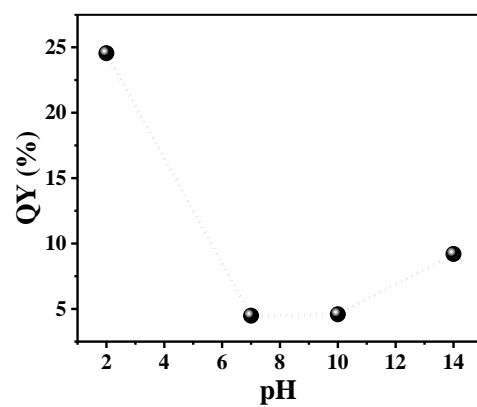

**Figure S2.** Quantum yields of 2-CDs, 7-CDs, 10-CDs and 14-CDs.
